# Supplementary material for: E3 ubiquitin ligase Bre1 couples sister chromatid cohesion establishment to DNA replication in Saccharomyces cerevisiae
Source: eLife journal article supplement (doi:10.7554/elife.28231), 2017-10-23
Supplement: supp [file elife-28231-supp-v1.zip]

**A**

| WT     | <i>bre1Δ</i> | No tag |            |
|--------|--------------|--------|------------|
| [band] | [band]       | [band] | Psf2-13Myc |
| [band] | [band]       | [band] | Pgk1       |

**B**

| WT     | <i>bre1Δ</i> | No tag |            |
|--------|--------------|--------|------------|
| [band] | [band]       | [band] | Polα-13Myc |
| [band] | [band]       | [band] | Pgk1       |

**C**

| WT     | <i>bre1Δ</i> | No tag |             |
|--------|--------------|--------|-------------|
| [band] | [band]       | [band] | Mcm10-13Myc |
| [band] | [band]       | [band] | Pgk1        |

**D**

| Psf2-13Myc  |              |             |
|-------------|--------------|-------------|
| WT          | <i>bre1Δ</i> |             |
| [histogram] | [histogram]  | Noc         |
| [histogram] | [histogram]  | HU          |
| [histogram] | [histogram]  | α-F         |
| [histogram] | [histogram]  | Asyn.       |
| 1C 2C       | 1C 2C        | DNA content |

**E**

| Polα-13Myc  |              |             |
|-------------|--------------|-------------|
| WT          | <i>bre1Δ</i> |             |
| [histogram] | [histogram]  | Noc         |
| [histogram] | [histogram]  | HU          |
| [histogram] | [histogram]  | α-F         |
| [histogram] | [histogram]  | Asyn.       |
| 1C 2C       | 1C 2C        | DNA content |

**F**

| Mcm10-13Myc |              |             |
|-------------|--------------|-------------|
| WT          | <i>bre1Δ</i> |             |
| [histogram] | [histogram]  | Noc         |
| [histogram] | [histogram]  | HU          |
| [histogram] | [histogram]  | α-F         |
| [histogram] | [histogram]  | Asyn.       |
| 1C 2C       | 1C 2C        | DNA content |

**G**

| Input       |           | IP          |           |                 |
|-------------|-----------|-------------|-----------|-----------------|
| Mcm10-13Myc | Flag-Bre1 | Mcm10-13Myc | Flag-Bre1 |                 |
| [band]      | [band]    | [band]      | [band]    | * ← Flag-Bre1   |
| [band]      | [band]    | [band]      | [band]    | * ← Mcm10-13Myc |

**H**

| Input  |             | IP          |             |                                  |
|--------|-------------|-------------|-------------|----------------------------------|
| No-tag | Mcm10-13Myc | Mcm10-13Myc | Mcm10-13Myc |                                  |
| [band] | [band]      | [band]      | [band]      | Mcm10-13Myc                      |
| [band] | [band]      | [band]      | [band]      | * ← Mcm10-13Myc(Ub) <sub>2</sub> |
