# Supplementary material for: E3 ubiquitin ligase Bre1 couples sister chromatid cohesion establishment to DNA replication in Saccharomyces cerevisiae
Source: eLife journal article supplement (doi:10.7554/elife.28231), 2017-10-23
Supplement: supp [file elife-28231-supp-v1.zip]

Archive with 10 entries (10 files):
- elife_poa_e28231_Figure_5_figure_supplement_2.pdf
- elife_poa_e28231_Figure_5_figure_supplement_1.pdf
- elife_poa_e28231_Figure_2_figure_supplement_1.pdf
- elife_poa_e28231_Transparent_Reporting_File.pdf
- elife_poa_e28231_Supplementary_File_1.docx
- elife_poa_e28231_Supplementary_File_3.docx
- elife_poa_e28231_Figure_4_figure_supplement_1.pdf
- elife_poa_e28231_Supplementary_File_2.docx
- elife_poa_e28231_Figure_3_figure_supplement_1.pdf
- elife_poa_e28231_Figure_3_figure_supplement_2.pdf
