# Supplementary figures and images for: E3 ubiquitin ligase Bre1 couples sister chromatid cohesion establishment to DNA replication in Saccharomyces cerevisiae
Source: eLife journal article supplement (doi:10.7554/elife.28231), 2017-10-23

Figure 3 – figure supplement 2

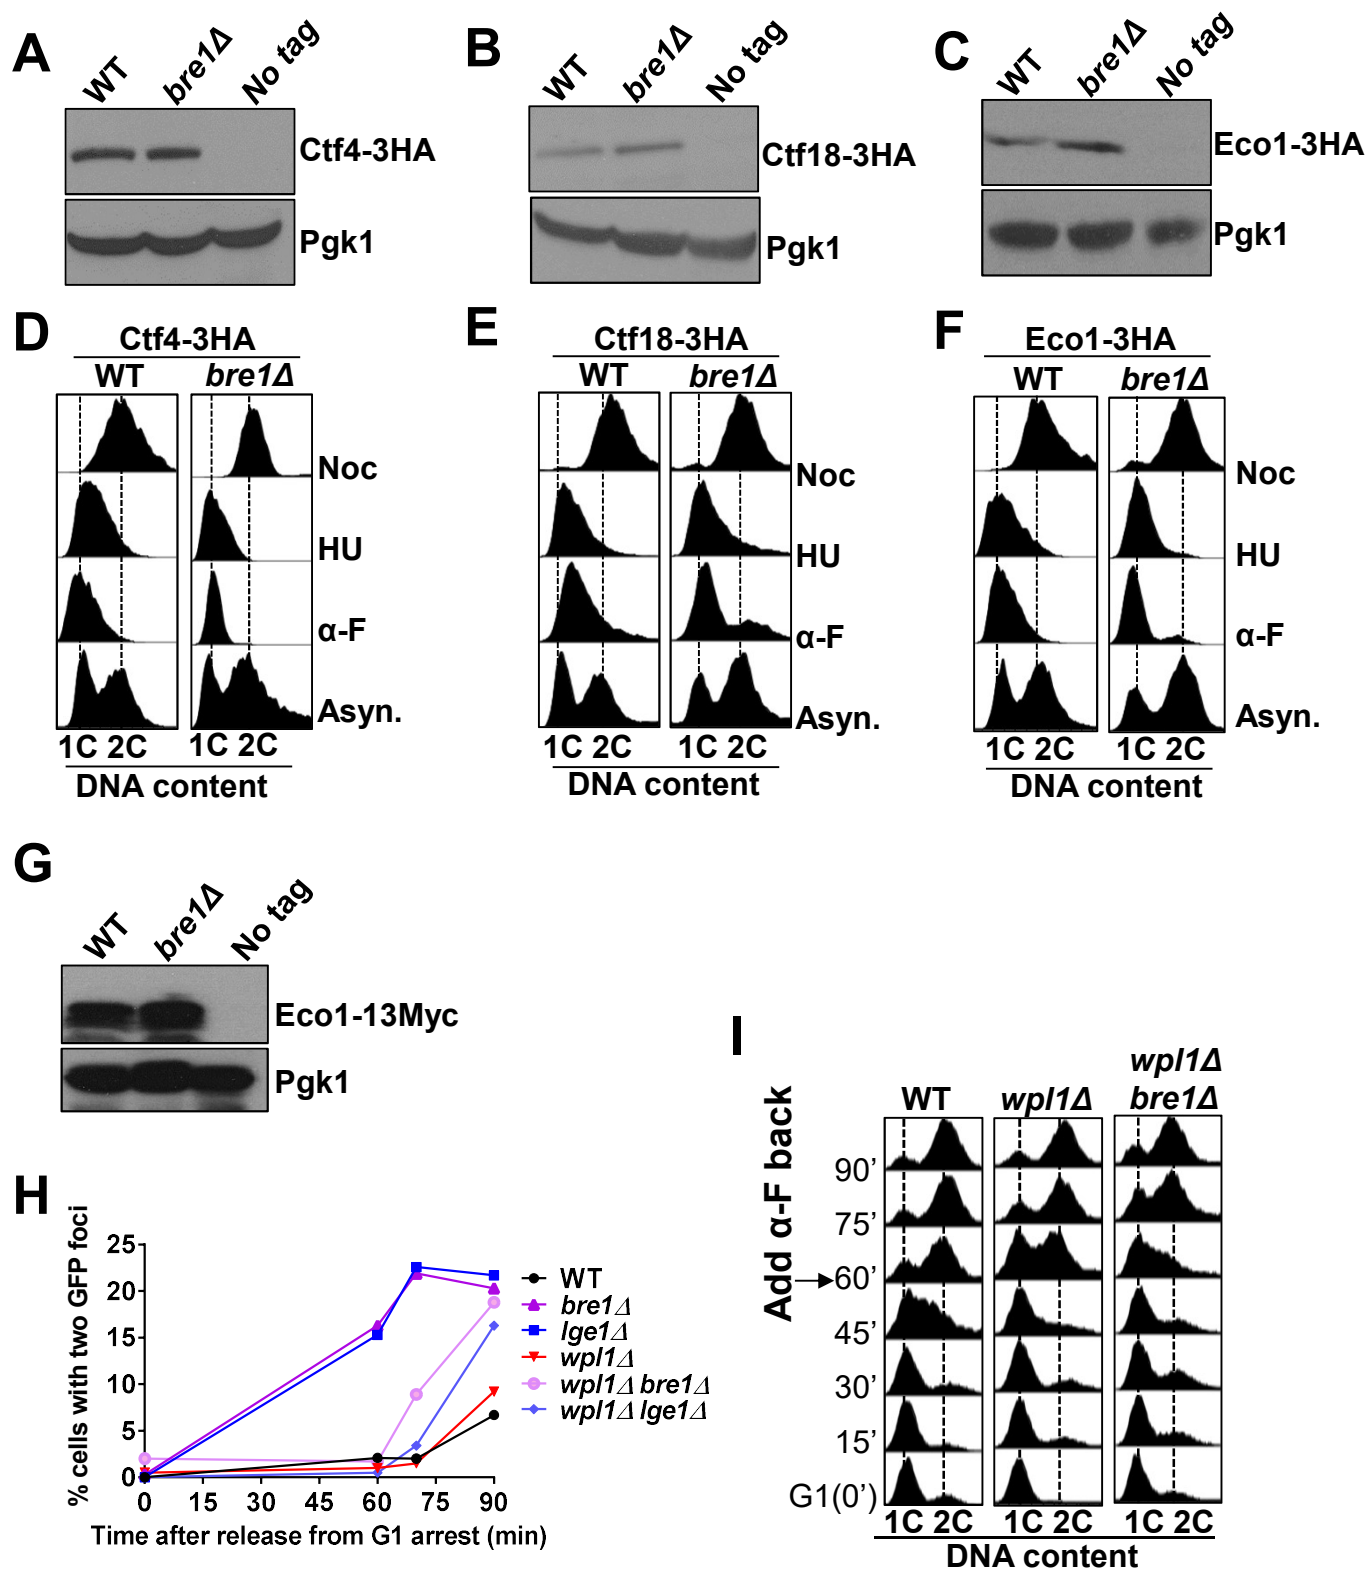

Supplement: supp [file elife-28231-supp-v1.zip]

Figure 2 – figure supplement 1

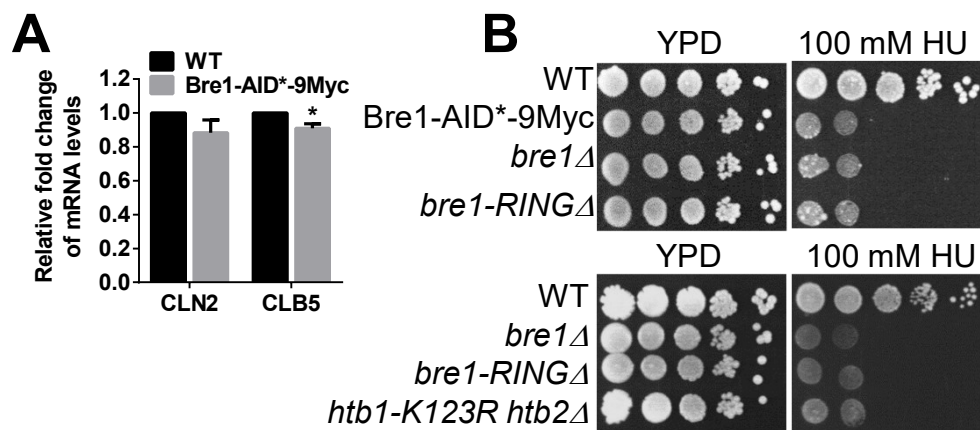

Supplement: supp [file elife-28231-supp-v1.zip]

# Figure 3 – figure supplement 1

**A**

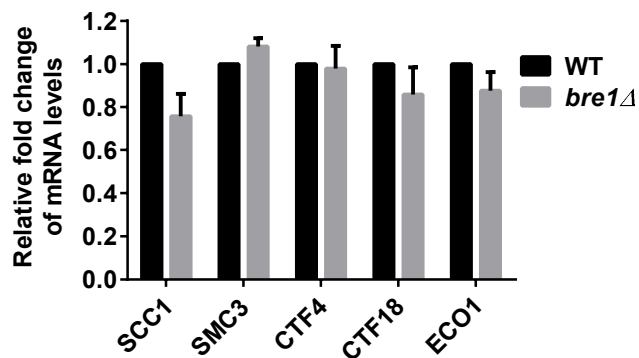

**B**

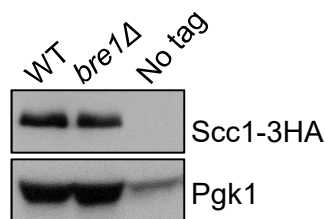

**C**

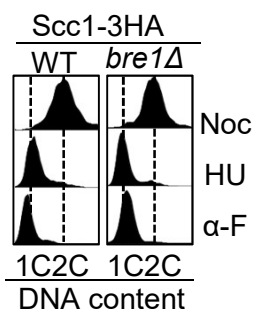

**D**

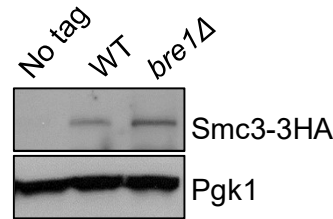

**E**

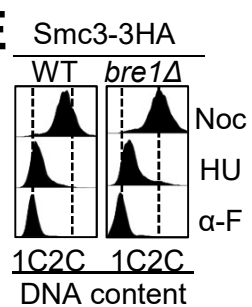

**F**

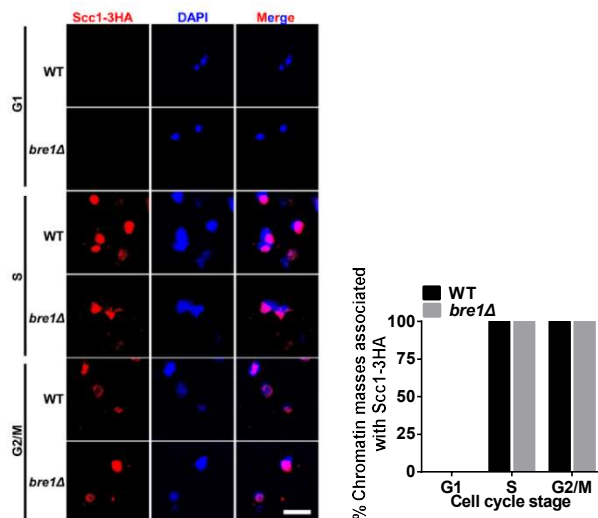

**G**

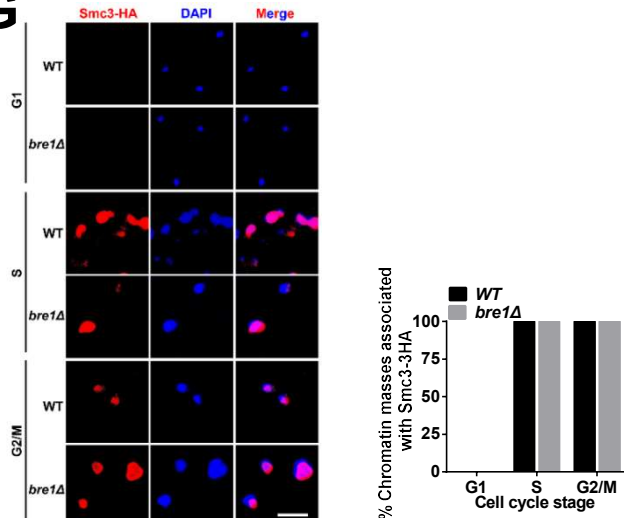

**H**

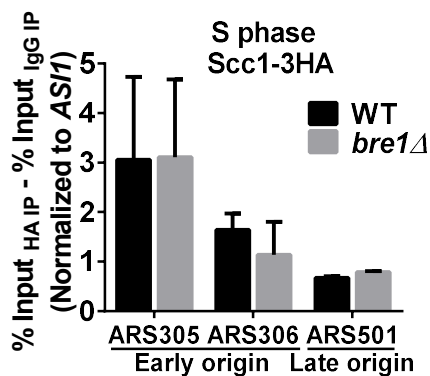

**I**

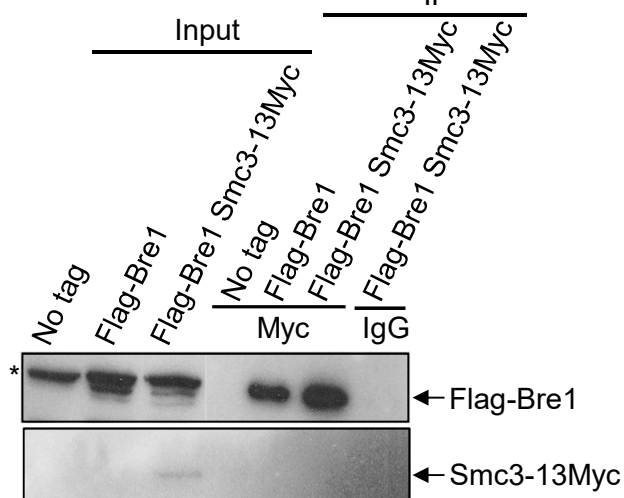

Supplement: supp [file elife-28231-supp-v1.zip]

Figure 5 – figure supplement 1

A

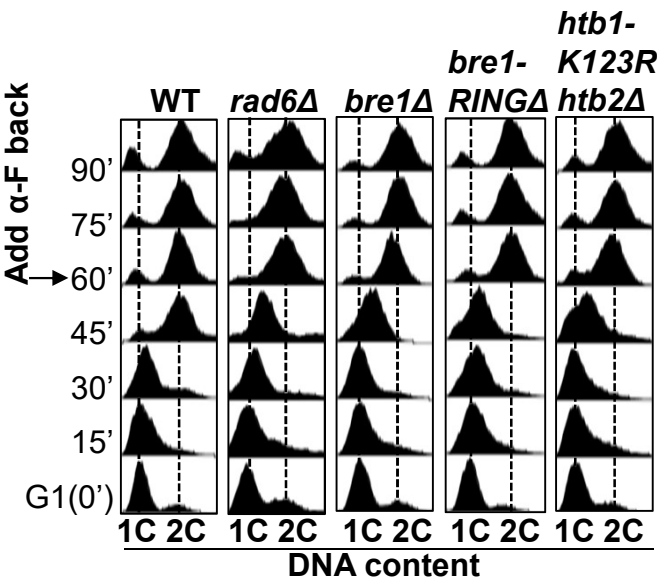

Supplement: supp [file elife-28231-supp-v1.zip]

Figure 5 – figure supplement 2

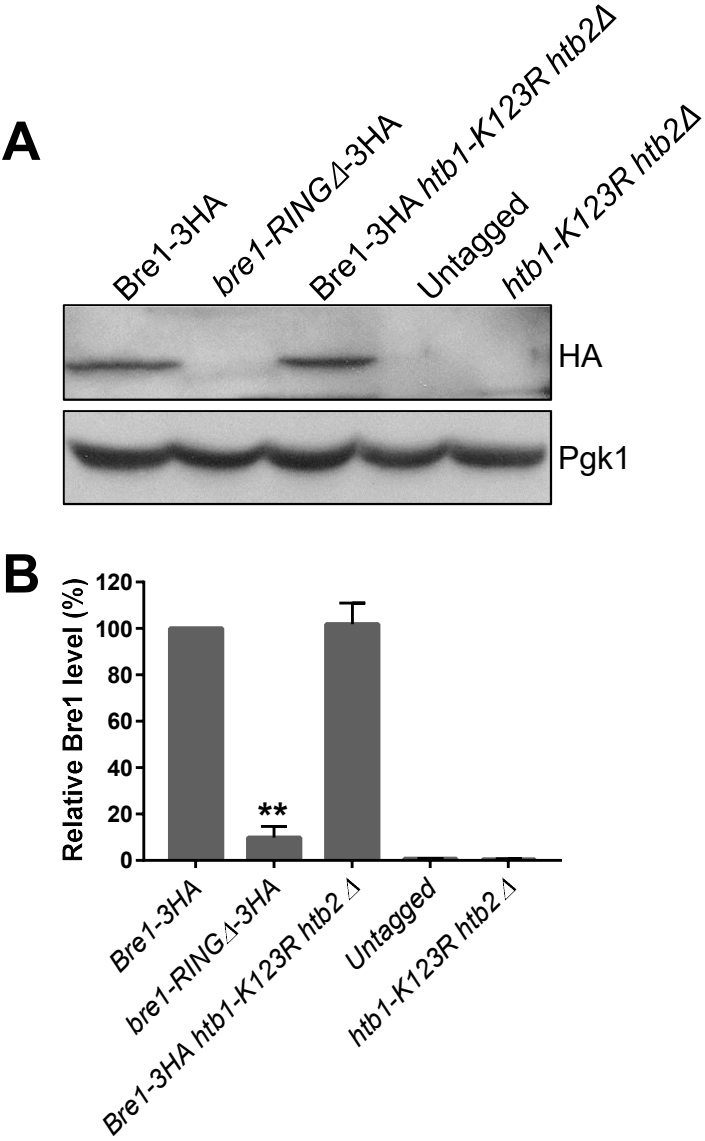

Supplement: supp [file elife-28231-supp-v1.zip]
